# Supplementary material for: Nonmonotone invasion landscape by noise-aware control of metastasis activator levels
Source: PubMed Central journal article supplement (PMC10299915; doi:10.1038/s41589-023-01344-z), 2023-05-25

Ectopic BACH1 Dose response in mNF-BACH1 dose response (right 6 lanes) & mNF-GFP dose response (middle 3 lanes) & native BACH1 in LP, KO, mNF-GFP low-noise with no induction and KO-ctrl (left 4 lanes)

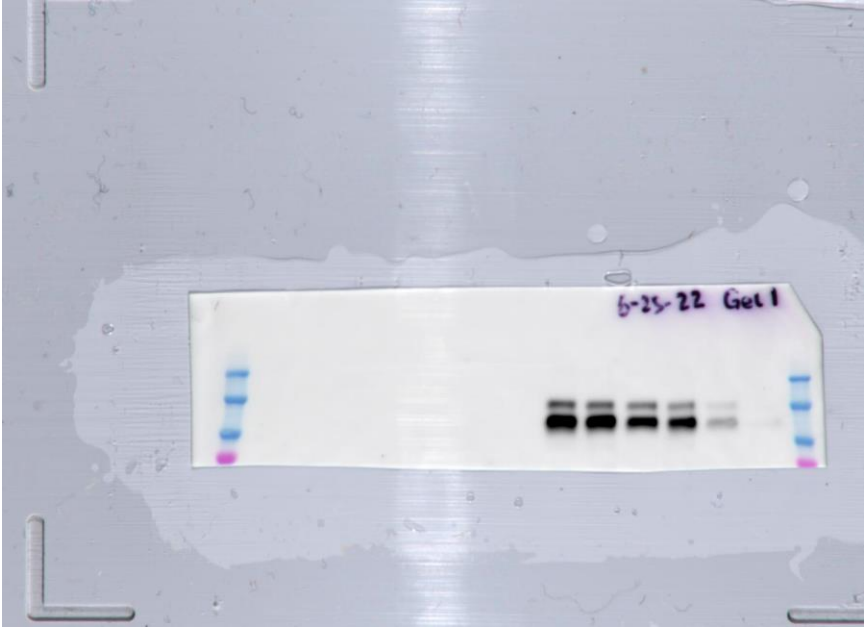

Ectopic BACH1 imaging minimized for Native BACH1

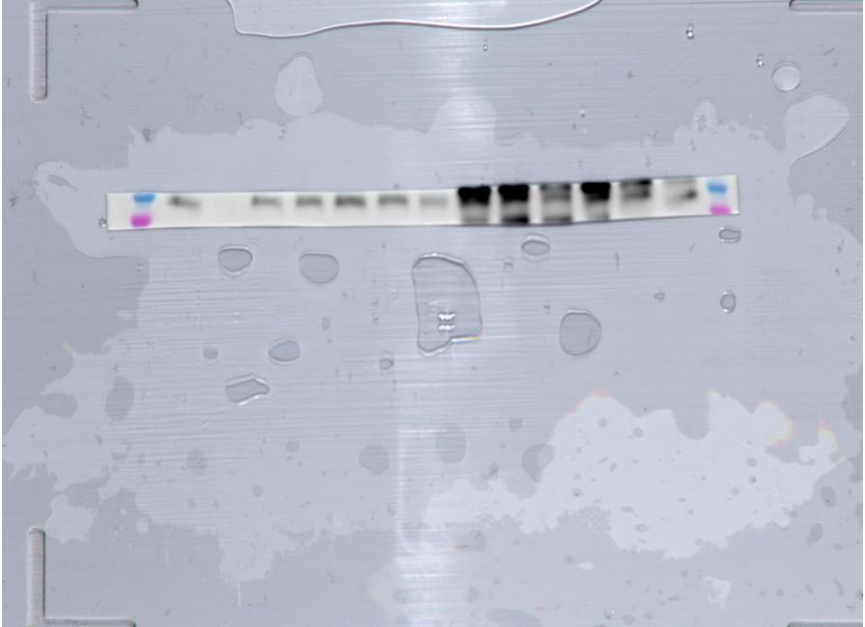

Beta-Tubulin internal reference in the same order

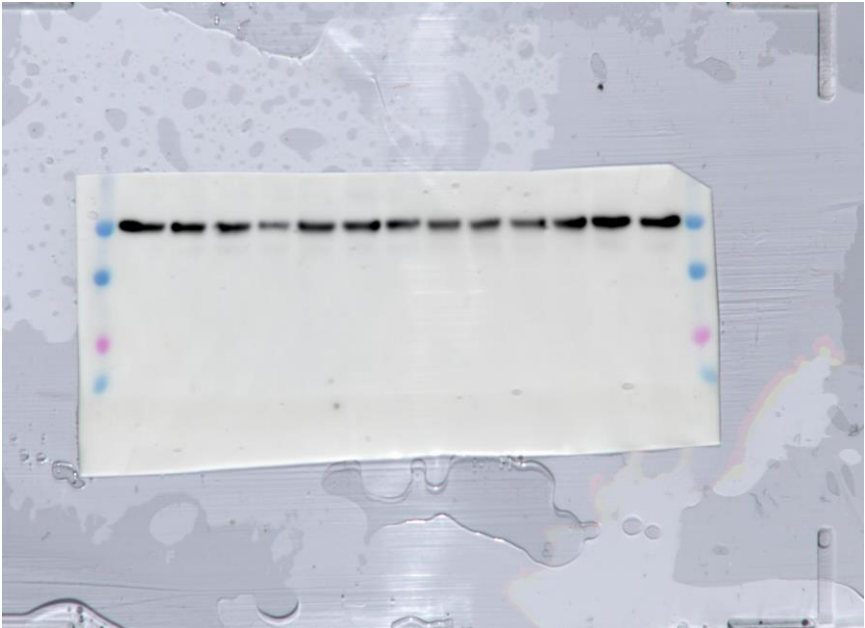

Supplement: 41589_2023_1344_MOESM5_ESM.pdf [file 41589_2023_1344_MOESM5_ESM.pdf]
