# Supplementary material for: Nonmonotone invasion landscape by noise-aware control of metastasis activator levels
Source: PubMed Central journal article supplement (PMC10299915; doi:10.1038/s41589-023-01344-z), 2023-05-25

Ectopic BACH1 together with Native BACH1

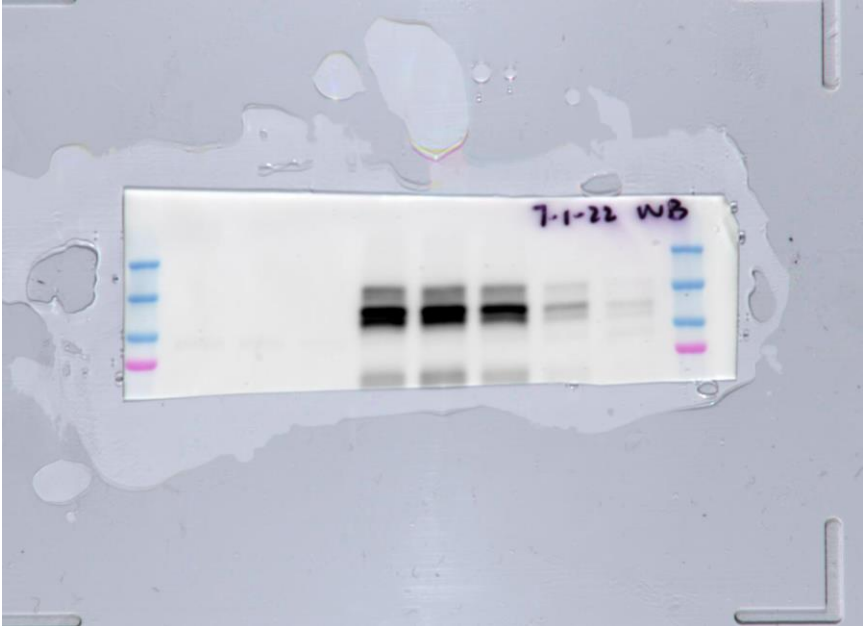

Ectopic BACH1 imaging minimized for Native BACH1

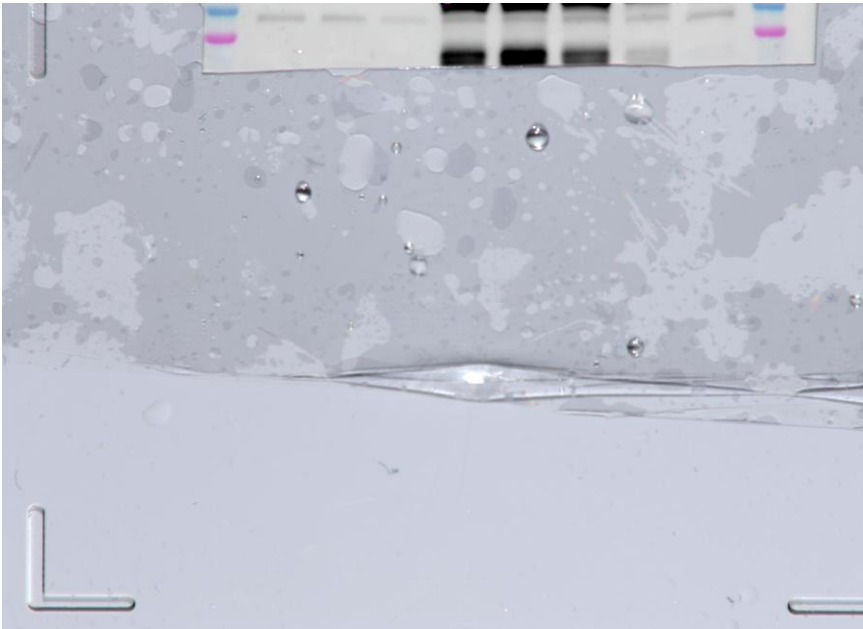

Beta-Tubulin internal reference

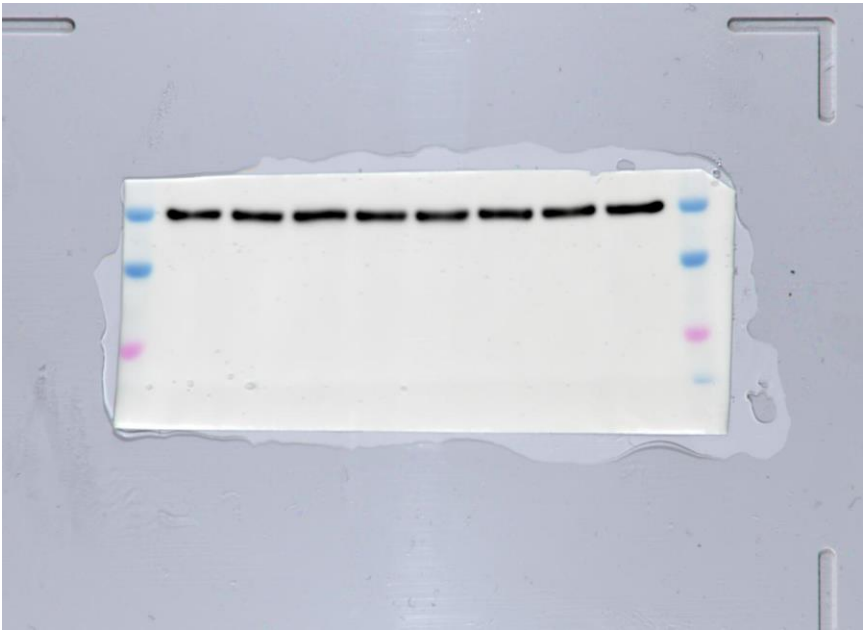

Supplement: 41589_2023_1344_MOESM9_ESM.pdf [file 41589_2023_1344_MOESM9_ESM.pdf]
