# Supplementary material for: Nonmonotone invasion landscape by noise-aware control of metastasis activator levels
Source: PubMed Central journal article supplement (PMC10299915; doi:10.1038/s41589-023-01344-z), 2023-05-25

MB231 LP clones 3' LP RI

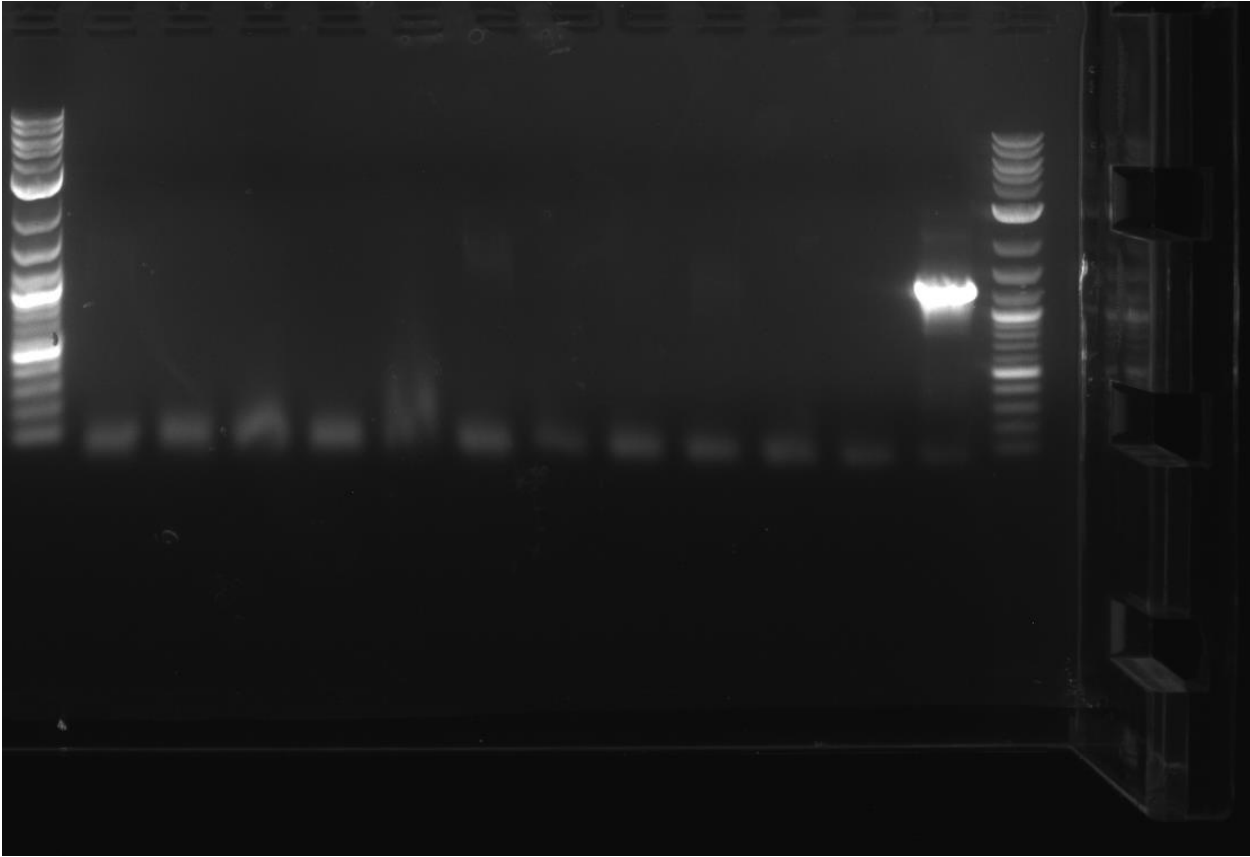

MB231 LP clones 5' LP JA and 3' LP JA

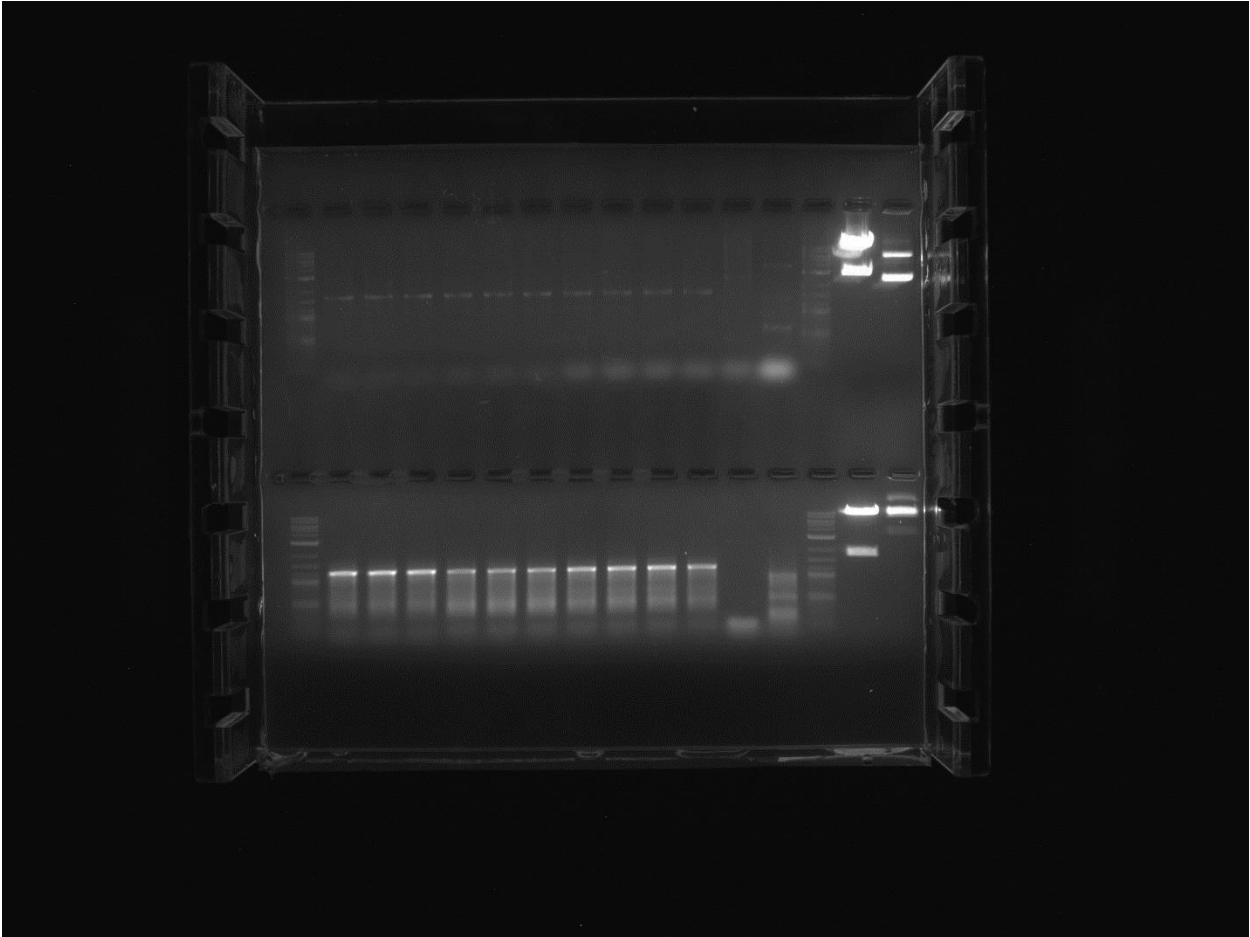

MB231 LP clones 5' LP RI

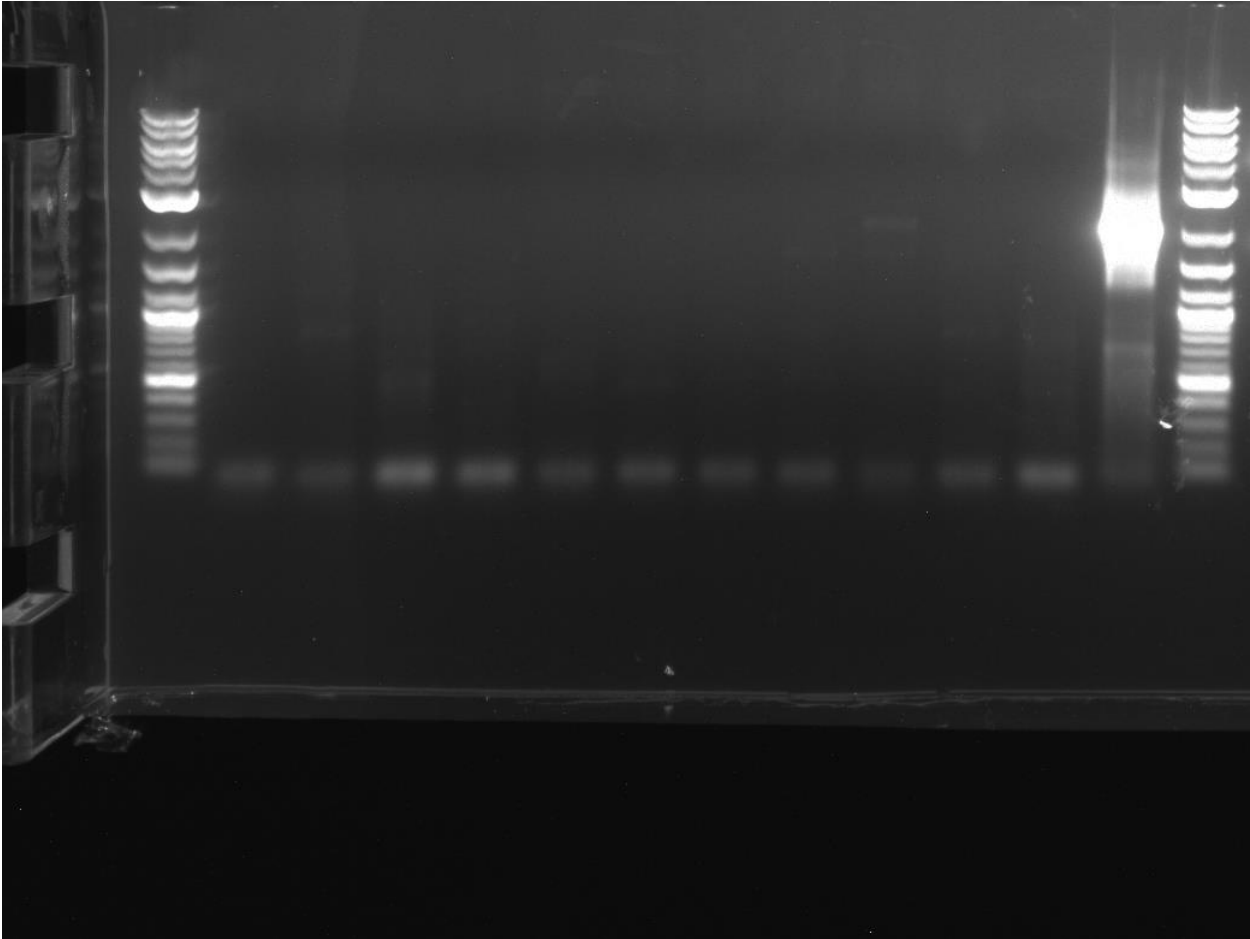

MB231 NF clones 5' and 3' NF JA

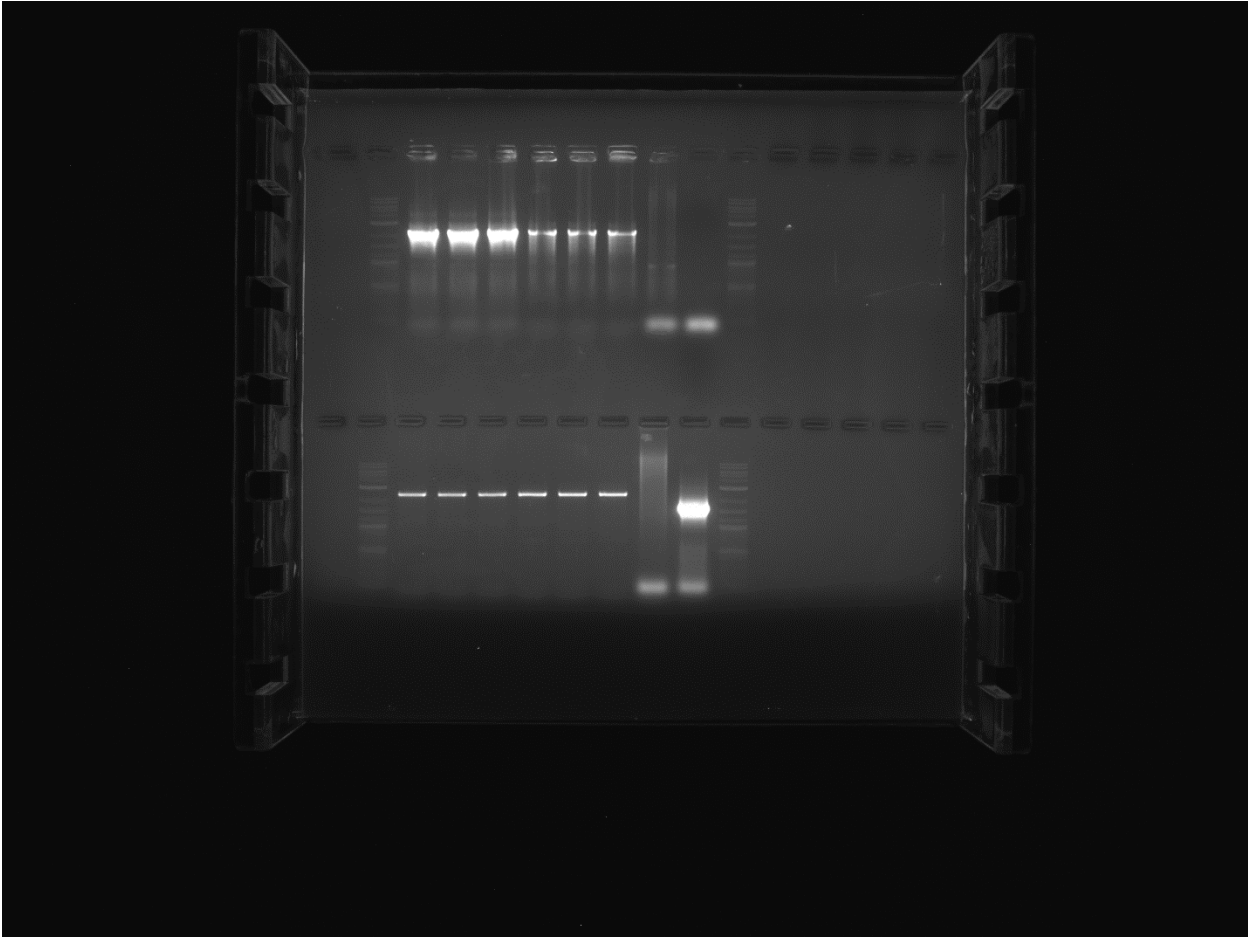

MB231 NF clones 5' and 3' NF RI

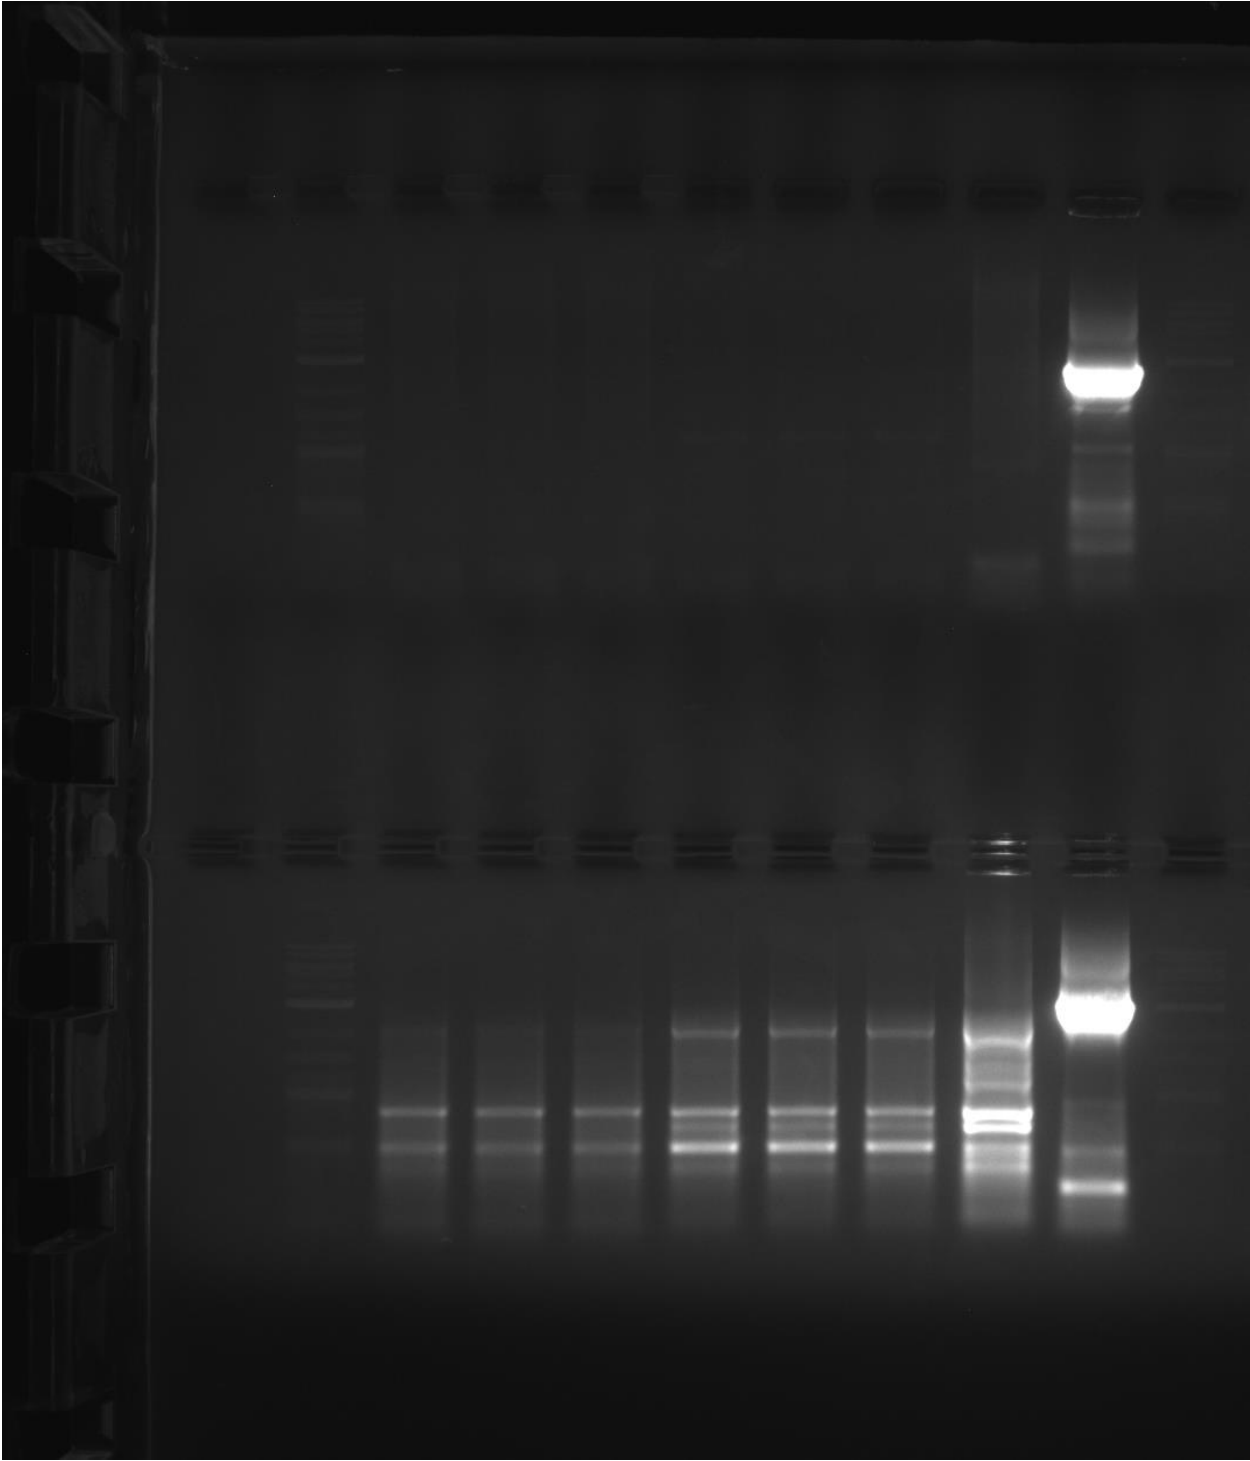

HEK293 LP clones 3 LP JA

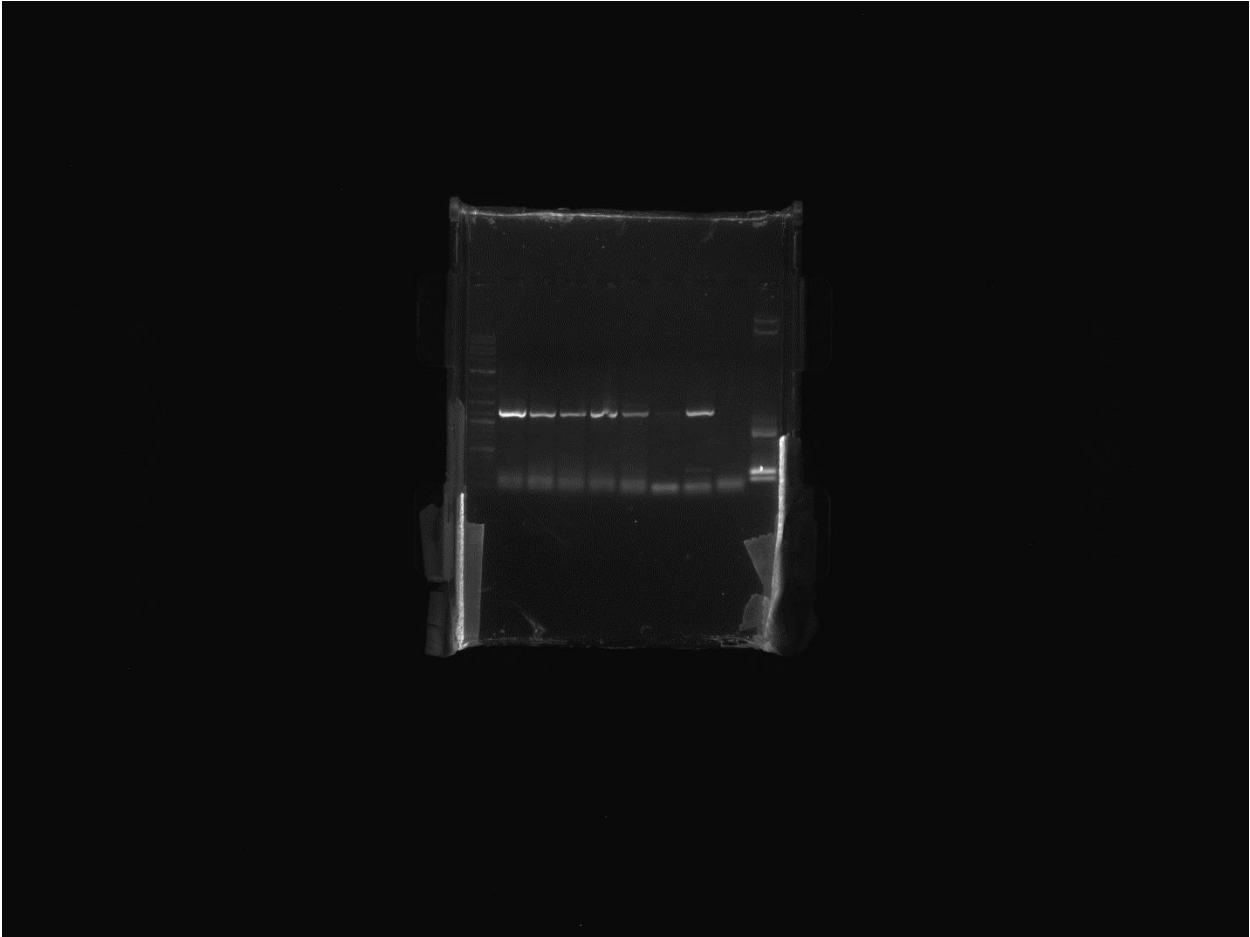

HEK293 LP clones 5' LP JA

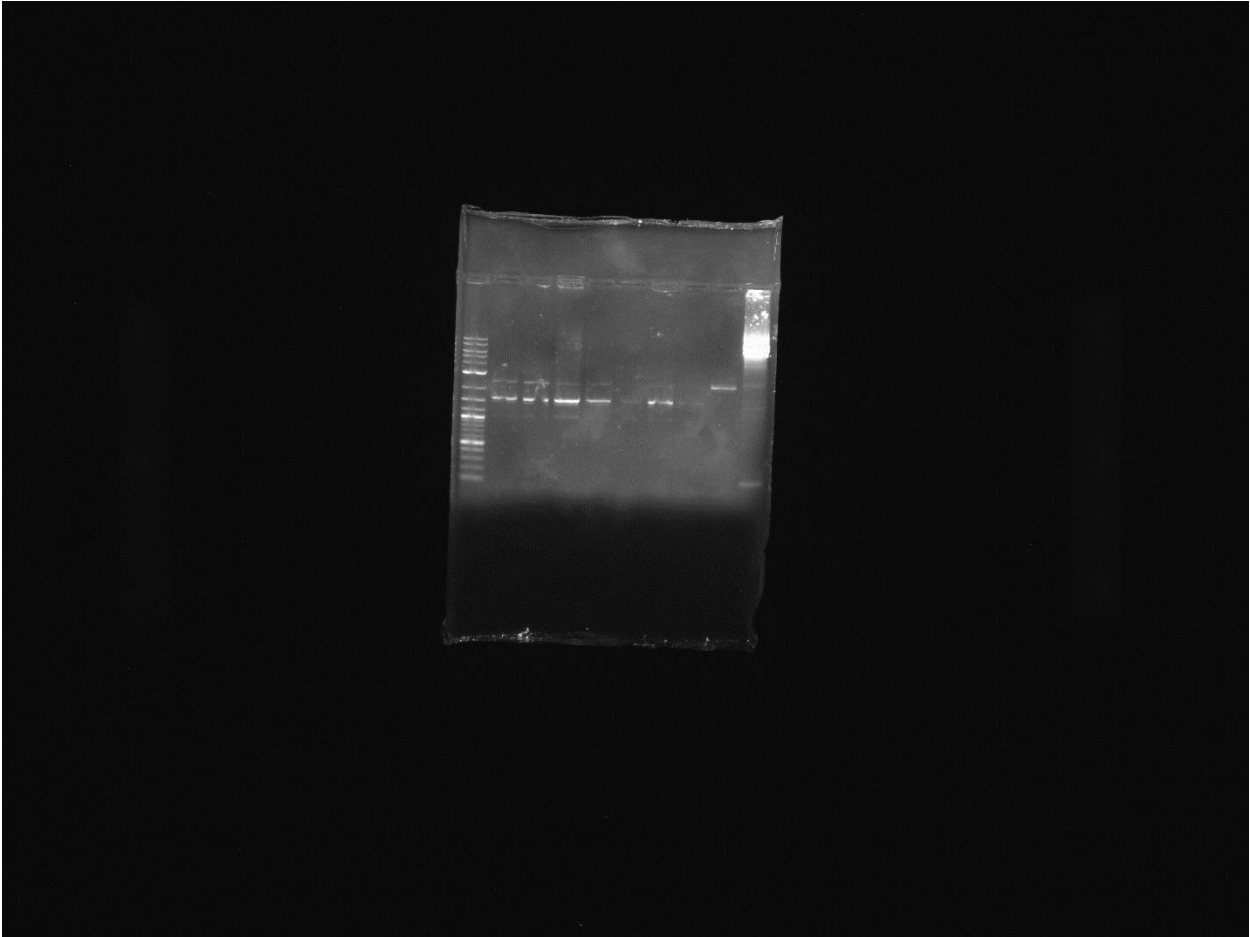

HEK293 NF clones 3' NF RI

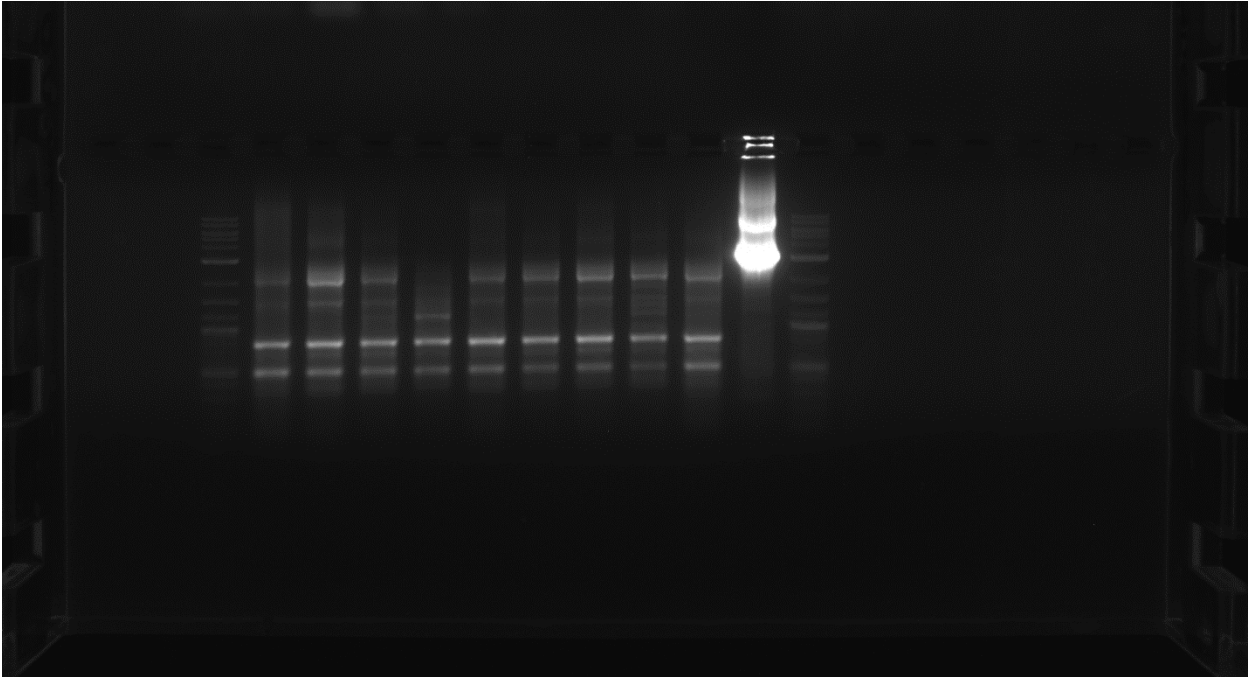



HEK293 NF clones 3' NF JA

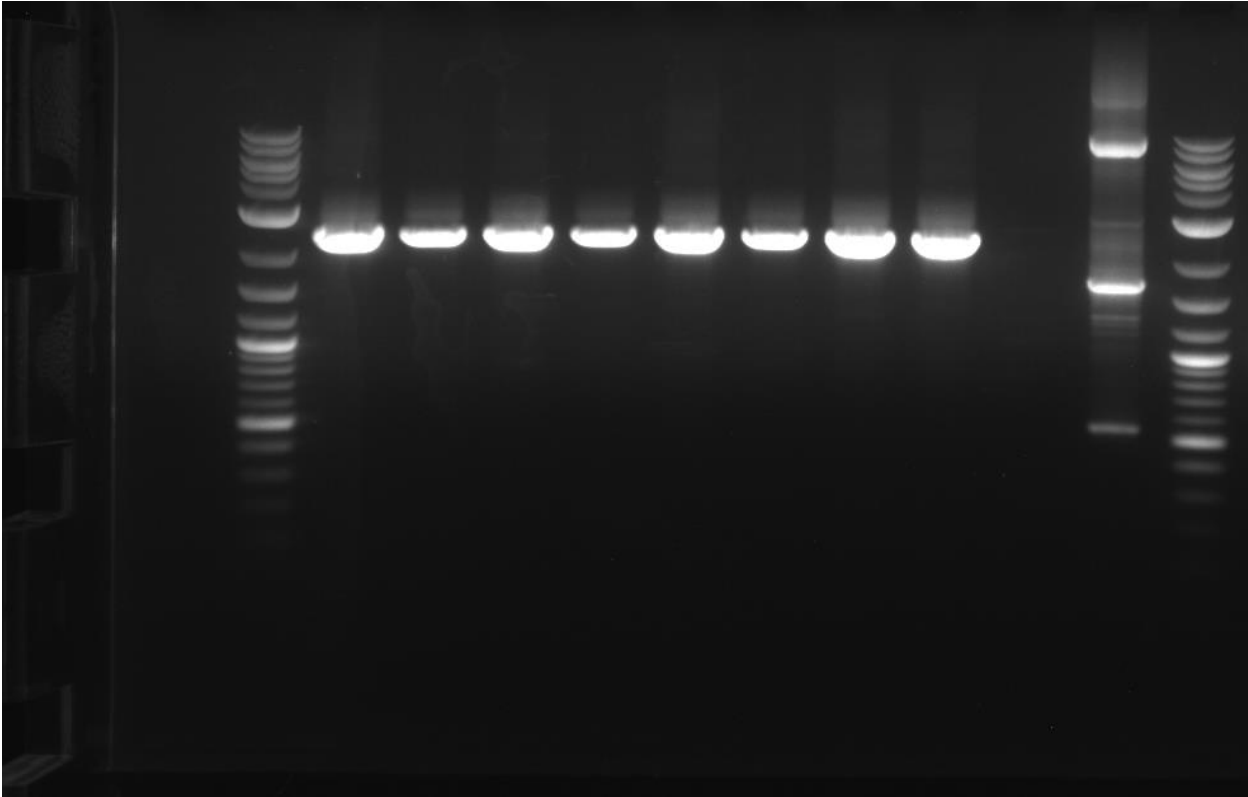

HEK293 NF clones 5' NF RI

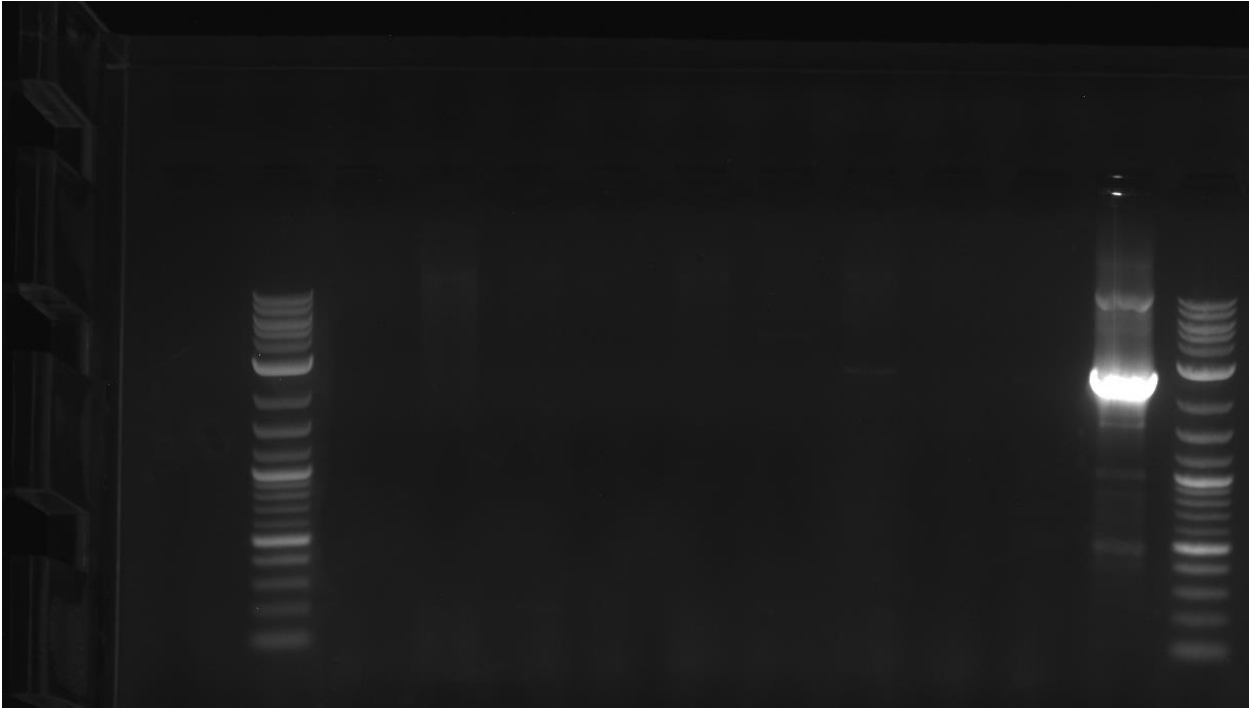

HEK293 NF clones 5' NF JA

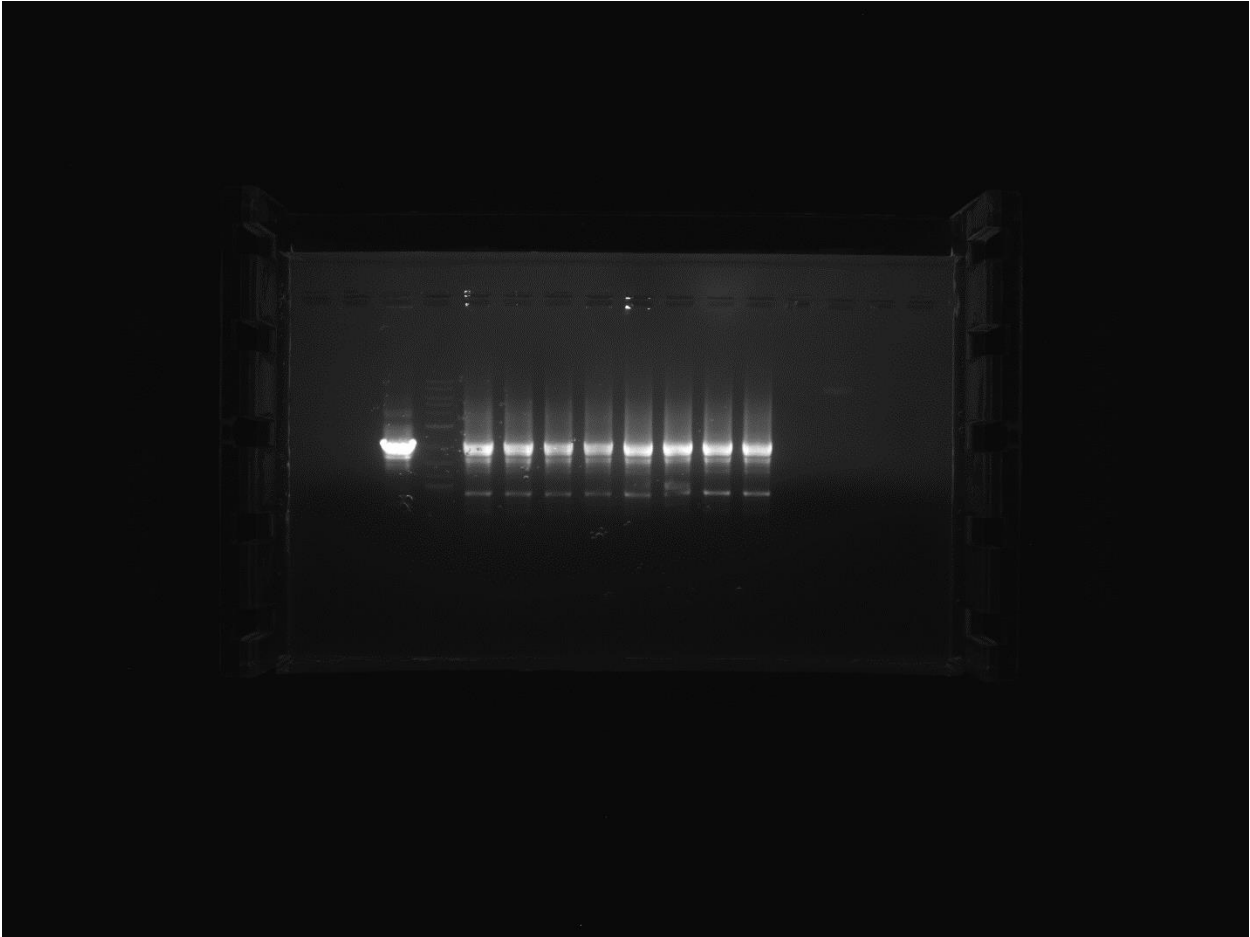

HEK293-LP clones 3' LP RI

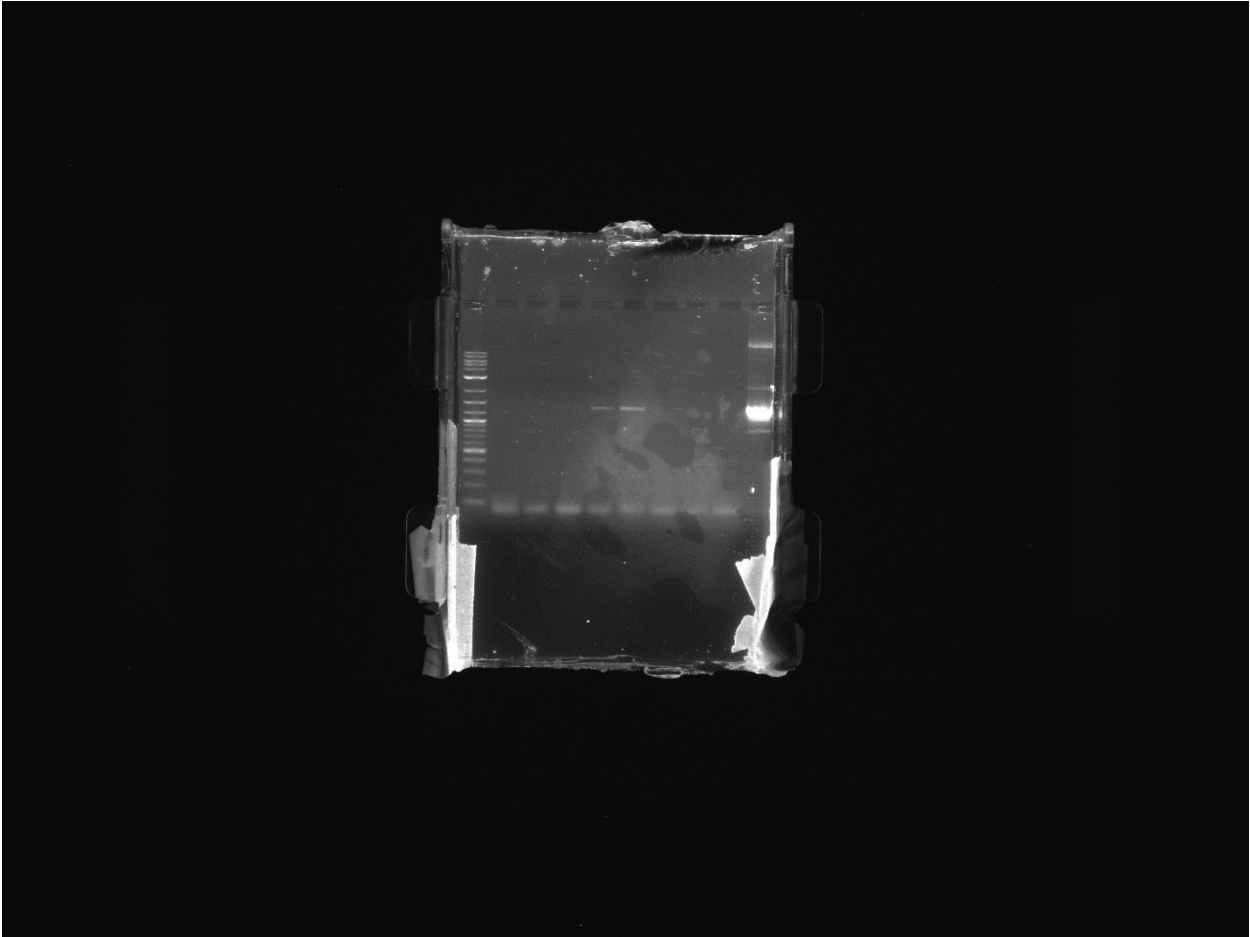

HEK293-LP clones 5' LP RI

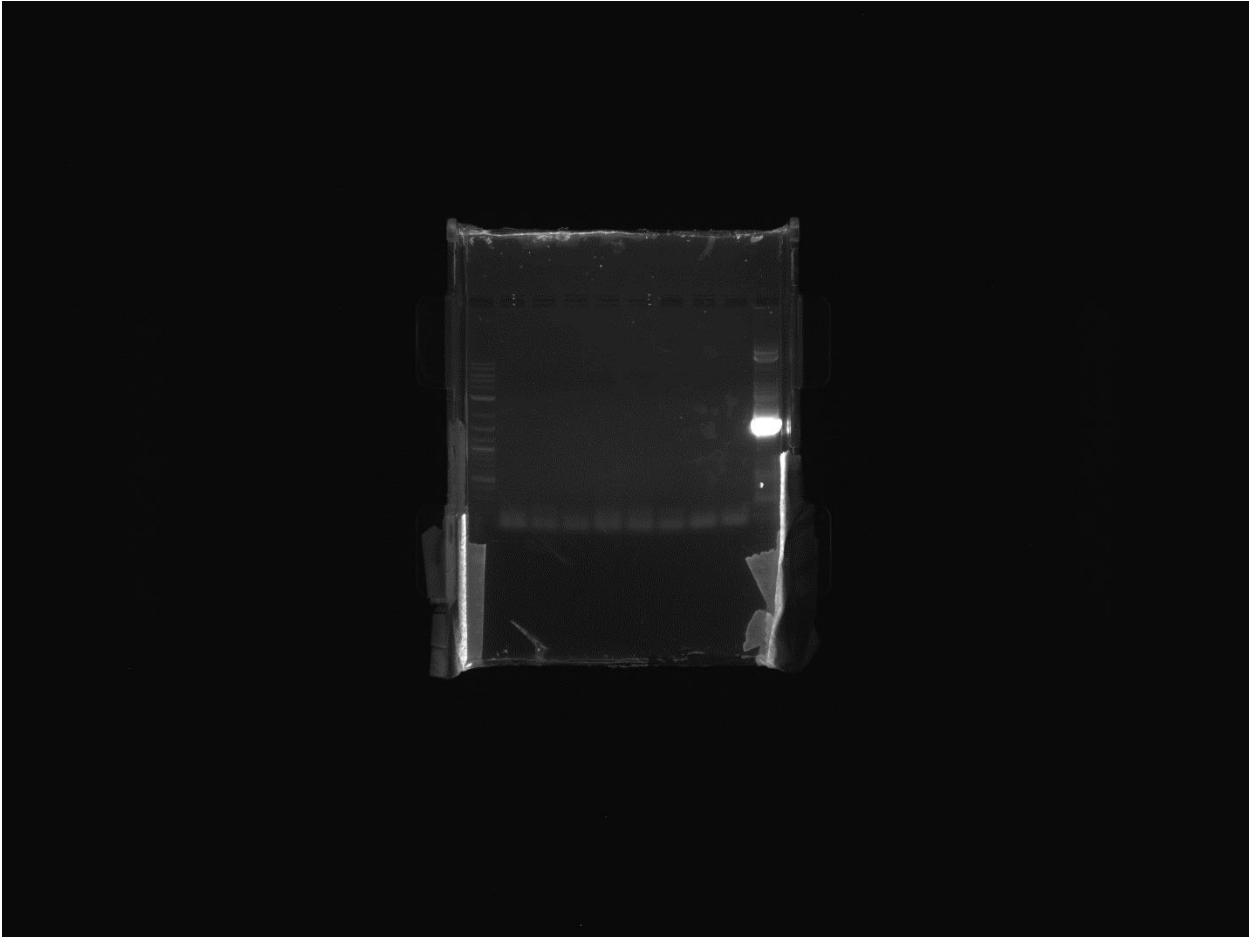

Supplement: 41589_2023_1344_MOESM12_ESM.pdf [file 41589_2023_1344_MOESM12_ESM.pdf]
